# Supplementary material for: Highly efficient selective hydrogenation of levulinic acid to γ-valerolactone over Cu–Re/TiO2 bimetallic catalysts
Source: Royal Society of Chemistry journal article supplement (doi:10.1039/d1ra05804e), 2021-12-22
Supplement: d1ra05804e1.pdf [file d1ra05804e1.pdf]

# Highly efficient selective hydrogenation of levulinic acid to $\gamma$ -valerolactone over Cu-Re/TiO<sub>2</sub> bimetallic catalyst

Yingxin Liu<sup>1,2</sup>, Kai Liu, Meihua Zhang<sup>1</sup>, Kaiyue Zhang<sup>1</sup>, Jiao Ma<sup>1</sup>,  
Shuwen Xiao<sup>3,4</sup>, Zuojun Wei<sup>3,4,\*</sup>, Shuguang Deng<sup>2,\*</sup>

<sup>1</sup> *College of Pharmaceutical Science, Zhejiang University of Technology,  
Hangzhou 310014, P.R. China*

<sup>2</sup> *School for Engineering of Matter, Transport and Energy, Arizona State  
University, 551 E. Tyler Mall, Tempe, AZ 85287, USA*

<sup>3</sup> *Key Laboratory of Biomass Chemical Engineering of the Ministry of  
Education, College of Chemical and Biological Engineering, Zhejiang  
University, Hangzhou 310027, P.R. China*

<sup>4</sup> *Institute of Zhejiang University-Quzhou, 78 Jiuhua Boulevard North,  
Quzhou 324000, P.R. China*

Corresponding author. E-mail address: weizuojun@zju.edu.cn,  
Shuguang.Deng@asu.edu.

Table S1 Copper-based catalysts for the hydrogenation of LA to GVL

| Catalysts                             | LA conversion (%) | GVL selectivity (%) | Solvent     | H donor               | Temp, time   | Catalyst Recyclability | Reference |
|---------------------------------------|-------------------|---------------------|-------------|-----------------------|--------------|------------------------|-----------|
| Cu/SiO <sub>2</sub>                   | 48                | 80                  |             |                       |              |                        |           |
| Cu/TiO <sub>2</sub>                   | 8                 | 25                  | Water       | Formic acid           | 250 °C, 10 h | -                      | [1]       |
| Cu/ZSM-5                              | 38                | 4                   |             |                       |              |                        |           |
| Cu-WO <sub>3</sub> /ZrO <sub>2</sub>  | 100               | 94                  | Ethanol     |                       |              | 5                      |           |
| Cu/ZSM-5                              | 100               | 99                  | Water       | 50 bar H <sub>2</sub> | 200 °C, 6 h  | -                      | [2]       |
| Cu-TiO <sub>2</sub> /ZrO <sub>2</sub> | 100               | 78                  | Ethanol     |                       |              | -                      |           |
| Cu/Al <sub>2</sub> O <sub>3</sub>     | 75                | 88                  | Water       | 65 bar H <sub>2</sub> | 250 °C, 6 h  | -                      | [3]       |
| Cu/ZrO <sub>2</sub>                   | 60                | 100                 | Water       | Formic acid           | 180 °C, 5 h  | -                      | [4]       |
| Ni-Cu/Al <sub>2</sub> O <sub>3</sub>  | 100               | 96                  | Water       | 65 bar H <sub>2</sub> | 250 °C, 2h   | -                      | [3]       |
| Cu/Fe                                 | 98.7              | 90.1                | Water       | 70 bar H <sub>2</sub> | 200 °C, 10 h | 3                      | [5]       |
| Cu-Re/TiO <sub>2</sub>                | 98.9              | 98.6                | 1,4-dioxane | 40 bar H <sub>2</sub> | 180 °C, 3h   | 6                      | This work |

## References:

1. S. Lomate, A. Sultana, T. Fujitani, *Catalysis Letters*, 2017, 148 (1), 348-358.
2. I. Obregón, E. Corro, U. Izquierdo, et al, *Chinese Journal of Catalysis*, 2014, 35 (5), 656-662.
3. Q. Xu, X. Li, T. Pan, et al, *Green Chemistry*, 2016, 18 (5), 1287-1294.
4. K. Yan, A. Chen, *Fuel*, 2014, 115, 101-108.
5. J. Yuan, S.-S. Li, L. Yu, et al, *Energy & Environmental Science*, 2013, 6 (11), 3308-3313.
